# Supplementary material for: Urban cultivation in allotments maintains soil qualities adversely affected by conventional agriculture
Source: PubMed Central journal article supplement (PMC4301088; doi:10.1111/1365-2664.12254), 2014-04-24
Supplement: JPE-51-880-s001.pdf [file JPE-51-880-s001.pdf]

**Fig. S1:** Mean soil nitrogen density in urban allotment and agricultural soils: 0 – 7 cm depth represented by white bars; 7 – 14 cm indicated by grey bars. Error bars are  $\pm 1$  standard error.

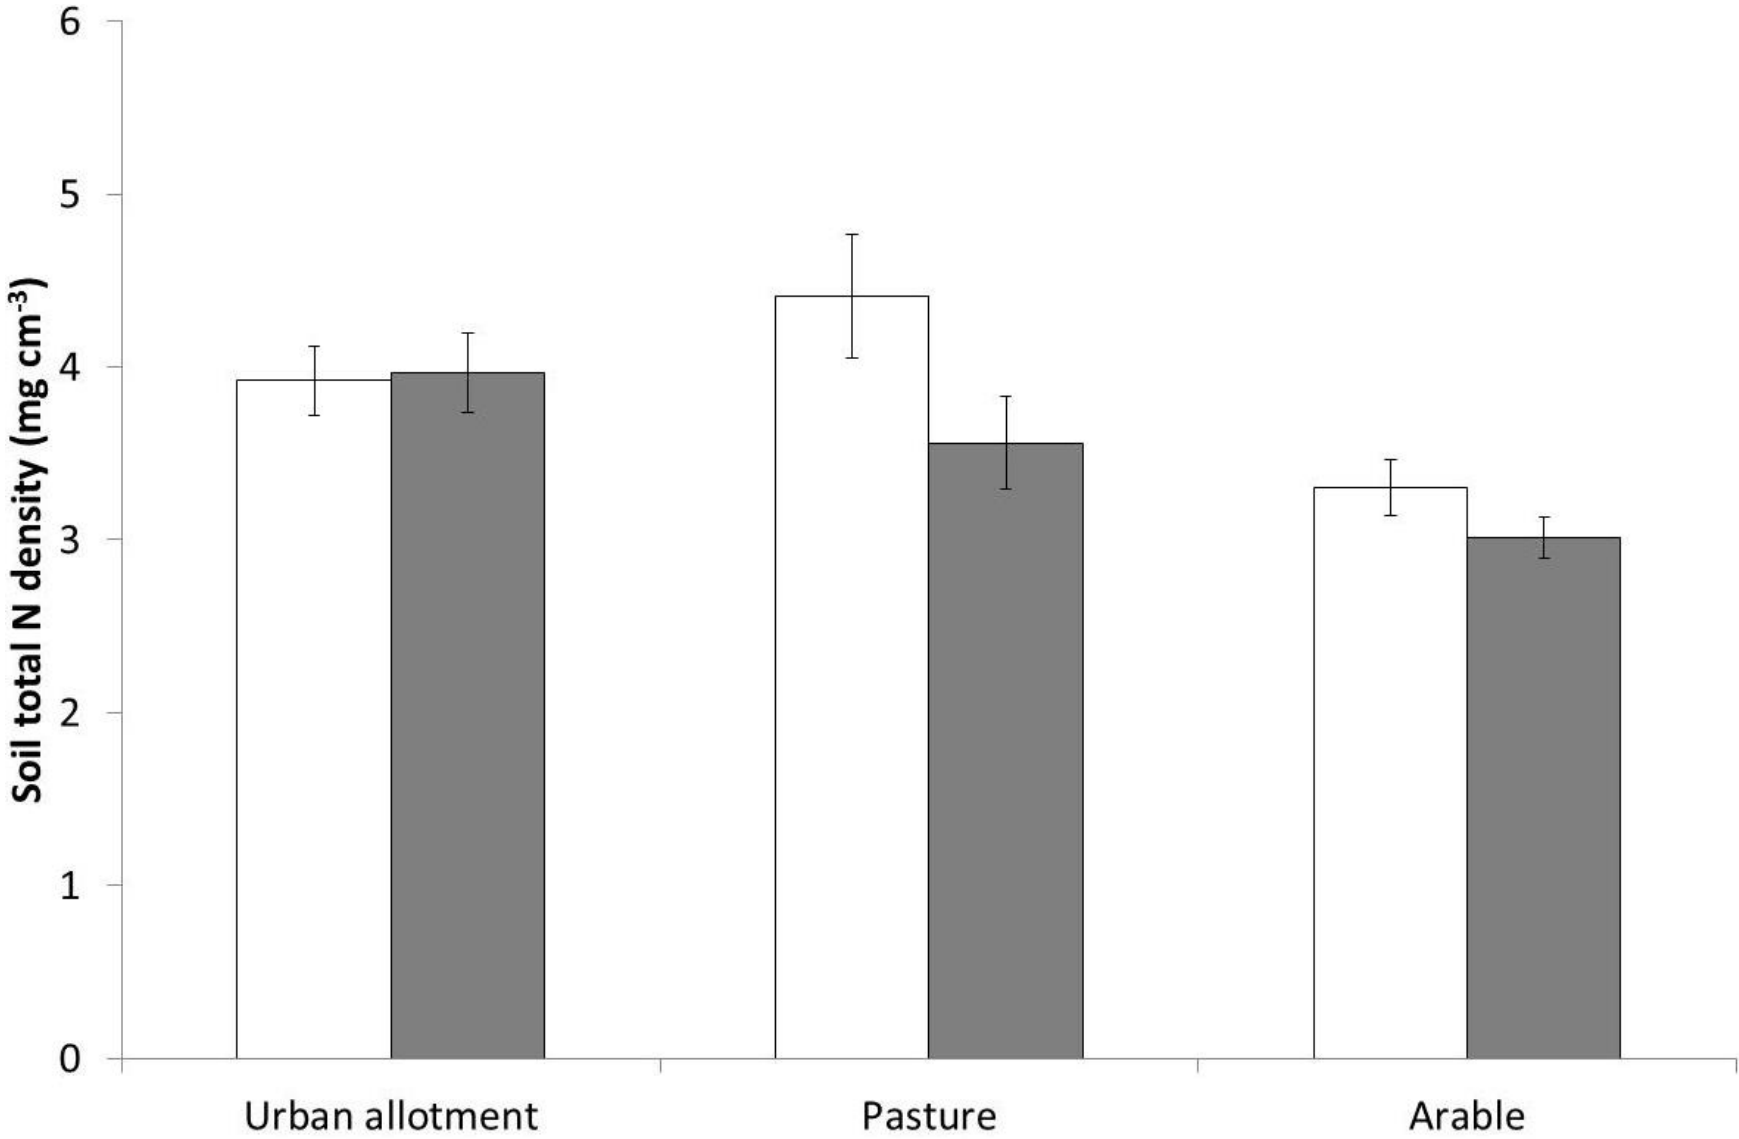

Jill L Edmondson, Zoe G. Davies, Kevin J. Gaston, Jonathan R. Leake. Urban cultivation in allotments maintains soil qualities adversely affected by conventional agriculture
