# Supplementary material for: Urban cultivation in allotments maintains soil qualities adversely affected by conventional agriculture
Source: PubMed Central journal article supplement (PMC4301088; doi:10.1111/1365-2664.12254), 2014-04-24
Supplement: JPE-51-880-s002.pdf [file JPE-51-880-s002.pdf]

Urban cultivation in allotments maintains soil qualities adversely affected by conventional agriculture

Jill L Edmondson, Zoe G. Davies, Kevin J. Gaston, Jonathan R. Leake

**Table S1:** GPS coordinates of each soil sample site

| <b>Land-use</b>         | <b>Landcover</b>      | <b>Latitude</b> | <b>Longitude</b> |
|-------------------------|-----------------------|-----------------|------------------|
| Agriculture             | Arable                | 52.63           | -1.22            |
| Agriculture             | Arable                | 52.67           | -1.14            |
| Agriculture             | Arable                | 52.67           | -1.13            |
| Agriculture             | Arable                | 52.69           | -1.05            |
| Agriculture             | Arable                | 52.61           | -1.21            |
| Agriculture             | Arable                | 52.57           | -1.14            |
| Agriculture             | Arable                | 52.56           | -1.22            |
| Agriculture             | Arable                | 52.55           | -1.29            |
| Agriculture             | Arable                | 52.57           | -1.26            |
| Agriculture             | Arable                | 52.60           | -1.20            |
| Agriculture             | Arable                | 52.57           | -0.95            |
| Agriculture             | Arable                | 52.56           | -1.05            |
| Agriculture             | Arable                | 52.63           | -1.30            |
| Agriculture             | Arable                | 52.58           | -1.20            |
| Agriculture             | Arable                | 52.73           | -1.15            |
| Non-domestic greenspace | Herbaceous vegetation | 52.60           | -1.16            |
| Non-domestic greenspace | Herbaceous vegetation | 52.66           | -1.15            |
| Non-domestic greenspace | Herbaceous vegetation | 52.61           | -1.15            |
| Non-domestic greenspace | Herbaceous vegetation | 52.62           | -1.12            |
| Non-domestic greenspace | Herbaceous vegetation | 52.62           | -1.12            |
| Non-domestic greenspace | Herbaceous vegetation | 52.66           | -1.06            |
| Non-domestic greenspace | Herbaceous vegetation | 52.62           | -1.11            |
| Non-domestic greenspace | Herbaceous vegetation | 52.64           | -1.13            |
| Non-domestic greenspace | Herbaceous vegetation | 52.59           | -1.10            |
| Non-domestic greenspace | Herbaceous vegetation | 52.64           | -1.16            |
| Non-domestic greenspace | Herbaceous vegetation | 52.65           | -1.12            |
| Non-domestic greenspace | Herbaceous vegetation | 52.60           | -1.10            |
| Non-domestic greenspace | Herbaceous vegetation | 52.60           | -1.15            |
| Non-domestic greenspace | Herbaceous vegetation | 52.66           | -1.09            |
| Non-domestic greenspace | Herbaceous vegetation | 52.59           | -1.11            |
| Non-domestic greenspace | Herbaceous vegetation | 52.64           | -1.18            |
| Non-domestic greenspace | Herbaceous vegetation | 52.66           | -1.13            |
| Non-domestic greenspace | Herbaceous vegetation | 52.64           | -1.16            |
| Non-domestic greenspace | Herbaceous vegetation | 52.62           | -1.17            |
| Non-domestic greenspace | Herbaceous vegetation | 52.63           | -1.17            |
| Non-domestic greenspace | Herbaceous vegetation | 52.64           | -1.18            |
| Non-domestic greenspace | Herbaceous vegetation | 52.58           | -1.14            |
| Non-domestic greenspace | Herbaceous vegetation | 52.64           | -1.06            |
| Non-domestic greenspace | Herbaceous vegetation | 52.60           | -1.13            |
| Non-domestic greenspace | Herbaceous vegetation | 52.60           | -1.16            |
| Non-domestic greenspace | Herbaceous vegetation | 52.63           | -1.05            |
| Non-domestic greenspace | Herbaceous vegetation | 52.63           | -1.17            |
| Non-domestic greenspace | Herbaceous vegetation | 52.65           | -1.08            |
| Non-domestic greenspace | Herbaceous vegetation | 52.62           | -1.17            |
| Non-domestic greenspace | Herbaceous vegetation | 52.62           | -1.11            |

|                         |                       |       |       |
|-------------------------|-----------------------|-------|-------|
| Non-domestic greenspace | Herbaceous vegetation | 52.62 | -1.12 |
| Non-domestic greenspace | Herbaceous vegetation | 52.62 | -1.17 |
| Non-domestic greenspace | Herbaceous vegetation | 52.68 | -1.17 |
| Domestic garden         | Herbaceous vegetation | 52.60 | -1.10 |
| Domestic garden         | Herbaceous vegetation | 52.65 | -1.09 |
| Domestic garden         | Herbaceous vegetation | 52.66 | -1.16 |
| Domestic garden         | Herbaceous vegetation | 52.62 | -1.09 |
| Domestic garden         | Herbaceous vegetation | 52.59 | -1.15 |
| Domestic garden         | Herbaceous vegetation | 52.62 | -1.08 |
| Domestic garden         | Herbaceous vegetation | 52.65 | -1.04 |
| Domestic garden         | Herbaceous vegetation | 52.62 | -1.19 |
| Domestic garden         | Herbaceous vegetation | 52.65 | -1.16 |
| Domestic garden         | Herbaceous vegetation | 52.63 | -1.14 |
| Domestic garden         | Herbaceous vegetation | 52.60 | -1.13 |
| Domestic garden         | Herbaceous vegetation | 52.65 | -1.07 |
| Domestic garden         | Herbaceous vegetation | 52.64 | -1.14 |
| Domestic garden         | Herbaceous vegetation | 52.67 | -1.15 |
| Domestic garden         | Herbaceous vegetation | 52.60 | -1.11 |
| Domestic garden         | Herbaceous vegetation | 52.68 | -1.14 |
| Domestic garden         | Herbaceous vegetation | 52.60 | -1.13 |
| Domestic garden         | Herbaceous vegetation | 52.63 | -1.09 |
| Domestic garden         | Herbaceous vegetation | 52.62 | -1.09 |
| Domestic garden         | Herbaceous vegetation | 52.62 | -1.16 |
| Domestic garden         | Herbaceous vegetation | 52.65 | -1.09 |
| Domestic garden         | Herbaceous vegetation | 52.61 | -1.16 |
| Domestic garden         | Herbaceous vegetation | 52.65 | -1.16 |
| Domestic garden         | Herbaceous vegetation | 52.64 | -1.10 |
| Domestic garden         | Herbaceous vegetation | 52.62 | -1.16 |
| Domestic garden         | Herbaceous vegetation | 52.63 | -1.14 |
| Domestic garden         | Herbaceous vegetation | 52.60 | -1.10 |
| Domestic garden         | Herbaceous vegetation | 52.66 | -1.15 |
| Domestic garden         | Herbaceous vegetation | 52.63 | -1.14 |
| Domestic garden         | Herbaceous vegetation | 52.67 | -1.15 |
| Allotment               | Herbaceous vegetation | 52.61 | -1.17 |
| Allotment               | Herbaceous vegetation | 52.66 | -1.11 |
| Allotment               | Herbaceous vegetation | 52.63 | -1.15 |
| Allotment               | Herbaceous vegetation | 52.66 | -1.13 |
| Allotment               | Herbaceous vegetation | 52.66 | -1.13 |
| Allotment               | Herbaceous vegetation | 52.66 | -1.13 |
| Allotment               | Herbaceous vegetation | 52.65 | -1.13 |
| Allotment               | Herbaceous vegetation | 52.65 | -1.13 |
| Allotment               | Herbaceous vegetation | 52.63 | -1.07 |
| Allotment               | Herbaceous vegetation | 52.60 | -1.13 |
| Allotment               | Herbaceous vegetation | 52.60 | -1.13 |
| Allotment               | Herbaceous vegetation | 52.61 | -1.11 |
| Allotment               | Herbaceous vegetation | 52.64 | -1.06 |
| Allotment               | Herbaceous vegetation | 52.62 | -1.09 |
| Allotment               | Herbaceous vegetation | 52.62 | -1.10 |
| Allotment               | Herbaceous vegetation | 52.62 | -1.11 |
| Allotment               | Herbaceous vegetation | 52.66 | -1.13 |

|                         |                       |       |       |
|-------------------------|-----------------------|-------|-------|
| Allotment               | Herbaceous vegetation | 52.62 | -1.10 |
| Allotment               | Herbaceous vegetation | 52.64 | -1.09 |
| Agriculture             | Pasture               | 52.68 | -1.24 |
| Agriculture             | Pasture               | 52.65 | -1.16 |
| Agriculture             | Pasture               | 52.55 | -1.17 |
| Agriculture             | Pasture               | 52.66 | -1.07 |
| Agriculture             | Pasture               | 52.70 | -1.12 |
| Agriculture             | Pasture               | 52.55 | -1.07 |
| Agriculture             | Pasture               | 52.57 | -1.12 |
| Agriculture             | Pasture               | 52.57 | -1.08 |
| Agriculture             | Pasture               | 52.59 | -0.98 |
| Agriculture             | Pasture               | 52.58 | -0.94 |
| Agriculture             | Pasture               | 52.53 | -1.13 |
| Agriculture             | Pasture               | 52.66 | -1.04 |
| Non-domestic greenspace | Woody vegetation      | 52.66 | -1.15 |
| Non-domestic greenspace | Woody vegetation      | 52.62 | -1.07 |
| Non-domestic greenspace | Woody vegetation      | 52.59 | -1.14 |
| Non-domestic greenspace | Woody vegetation      | 52.66 | -1.16 |
| Non-domestic greenspace | Woody vegetation      | 52.63 | -1.10 |
| Non-domestic greenspace | Woody vegetation      | 52.61 | -1.09 |
| Non-domestic greenspace | Woody vegetation      | 52.63 | -1.17 |
| Non-domestic greenspace | Woody vegetation      | 52.65 | -1.17 |
| Non-domestic greenspace | Woody vegetation      | 52.62 | -1.17 |
| Non-domestic greenspace | Woody vegetation      | 52.63 | -1.17 |
| Non-domestic greenspace | Woody vegetation      | 52.68 | -1.17 |
| Non-domestic greenspace | Woody vegetation      | 52.63 | -1.05 |
| Non-domestic greenspace | Woody vegetation      | 52.58 | -1.14 |
| Non-domestic greenspace | Woody vegetation      | 52.63 | -1.20 |
| Non-domestic greenspace | Woody vegetation      | 52.63 | -1.11 |
| Non-domestic greenspace | Woody vegetation      | 52.65 | -1.08 |
| Non-domestic greenspace | Woody vegetation      | 52.62 | -1.17 |
| Non-domestic greenspace | Woody vegetation      | 52.63 | -1.17 |
| Non-domestic greenspace | Woody vegetation      | 52.61 | -1.11 |
| Non-domestic greenspace | Woody vegetation      | 52.61 | -1.13 |
| Non-domestic greenspace | Woody vegetation      | 52.65 | -1.15 |
| Non-domestic greenspace | Woody vegetation      | 52.60 | -1.15 |
| Non-domestic greenspace | Woody vegetation      | 52.60 | -1.11 |
| Non-domestic greenspace | Woody vegetation      | 52.66 | -1.16 |
| Non-domestic greenspace | Woody vegetation      | 52.62 | -1.07 |
| Non-domestic greenspace | Woody vegetation      | 52.64 | -1.16 |
| Non-domestic greenspace | Woody vegetation      | 52.64 | -1.13 |
| Non-domestic greenspace | Woody vegetation      | 52.64 | -1.12 |
| Non-domestic greenspace | Woody vegetation      | 52.63 | -1.15 |
| Non-domestic greenspace | Woody vegetation      | 52.62 | -1.17 |
| Non-domestic greenspace | Woody vegetation      | 52.66 | -1.16 |
| Non-domestic greenspace | Woody vegetation      | 52.64 | -1.16 |
| Non-domestic greenspace | Woody vegetation      | 52.62 | -1.18 |
| Non-domestic greenspace | Woody vegetation      | 52.61 | -1.14 |
| Non-domestic greenspace | Woody vegetation      | 52.60 | -1.15 |
| Non-domestic greenspace | Woody vegetation      | 52.62 | -1.18 |

|                         |                  |       |       |
|-------------------------|------------------|-------|-------|
| Non-domestic greenspace | Woody vegetation | 52.60 | -1.13 |
| Non-domestic greenspace | Woody vegetation | 52.65 | -1.07 |
| Non-domestic greenspace | Woody vegetation | 52.67 | -1.17 |
| Non-domestic greenspace | Woody vegetation | 52.64 | -1.13 |
| Non-domestic greenspace | Woody vegetation | 52.62 | -1.17 |
| Non-domestic greenspace | Woody vegetation | 52.65 | -1.07 |
| Non-domestic greenspace | Woody vegetation | 52.64 | -1.12 |
| Non-domestic greenspace | Woody vegetation | 52.58 | -1.15 |
| Non-domestic greenspace | Woody vegetation | 52.67 | -1.17 |
| Non-domestic greenspace | Woody vegetation | 52.66 | -1.12 |
| Non-domestic greenspace | Woody vegetation | 52.64 | -1.16 |
| Non-domestic greenspace | Woody vegetation | 52.63 | -1.14 |
| Non-domestic greenspace | Woody vegetation | 52.62 | -1.14 |
| Non-domestic greenspace | Woody vegetation | 52.62 | -1.17 |
| Non-domestic greenspace | Woody vegetation | 52.61 | -1.15 |
| Domestic garden         | Woody vegetation | 52.60 | -1.10 |
| Domestic garden         | Woody vegetation | 52.64 | -1.08 |
| Domestic garden         | Woody vegetation | 52.63 | -1.09 |
| Domestic garden         | Woody vegetation | 52.62 | -1.07 |
| Domestic garden         | Woody vegetation | 52.64 | -1.05 |
| Domestic garden         | Woody vegetation | 52.65 | -1.16 |
| Domestic garden         | Woody vegetation | 52.62 | -1.05 |
| Domestic garden         | Woody vegetation | 52.62 | -1.16 |
| Domestic garden         | Woody vegetation | 52.63 | -1.14 |
| Domestic garden         | Woody vegetation | 52.65 | -1.09 |
| Domestic garden         | Woody vegetation | 52.62 | -1.09 |
| Domestic garden         | Woody vegetation | 52.62 | -1.09 |
| Domestic garden         | Woody vegetation | 52.65 | -1.04 |
| Domestic garden         | Woody vegetation | 52.62 | -1.19 |
| Domestic garden         | Woody vegetation | 52.60 | -1.13 |
| Domestic garden         | Woody vegetation | 52.64 | -1.15 |
| Domestic garden         | Woody vegetation | 52.68 | -1.14 |
| Domestic garden         | Woody vegetation | 52.60 | -1.13 |
| Domestic garden         | Woody vegetation | 52.64 | -1.05 |
| Allotment               | Woody vegetation | 52.66 | -1.11 |
| Allotment               | Woody vegetation | 52.66 | -1.11 |
| Allotment               | Woody vegetation | 52.63 | -1.15 |
| Allotment               | Woody vegetation | 52.65 | -1.13 |
| Allotment               | Woody vegetation | 52.66 | -1.13 |
| Allotment               | Woody vegetation | 52.66 | -1.13 |
| Allotment               | Woody vegetation | 52.65 | -1.13 |
| Allotment               | Woody vegetation | 52.65 | -1.13 |
| Allotment               | Woody vegetation | 52.60 | -1.13 |
| Allotment               | Woody vegetation | 52.65 | -1.06 |
| Allotment               | Woody vegetation | 52.62 | -1.09 |
| Allotment               | Woody vegetation | 52.62 | -1.10 |
